# Supplementary material
Source: MDPI journal article supplement (https://www.mdpi.com/2225-1154/11/12/241)
Supplement: s1 [file s1]

Archive with 1 entries (1 files):
- climate-2681608-supplementary.pdf
